# Supplementary material for: In Silico, SwissADME, and DFT Studies of Newly Synthesized Oxindole Derivatives Followed by Antioxidant Studies
Source: Hindawi journal article supplement (doi:10.1155/2023/5553913), 2023-12-12

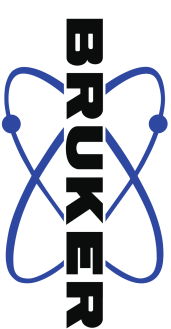

Current Data Parameters  
NAME 25-Dec-2022\_Dr. Ajmal  
EXPNO 93  
PROCNO 1

F2 - Acquisition Parameters  
Date\_ 20221229  
Time 1.14  
INSTRUM spect  
PROBHD 5 mm PABBO BB/  
PULPROG zg30  
TD 65536  
SOLVENT DMSO  
NS 16  
DS 2  
SWH 12019.230 Hz  
FIDRES 0.183399 Hz  
AQ 2.7262976 sec  
RG 56.38  
DW 41.600 usec  
DE 6.50 usec  
TE 298.2 K  
D1 1.00000000 sec  
TD0 1

===== CHANNEL f1 =====  
SFO1 600.1537062 MHz  
NUC1 1H  
P1 10.90 usec  
PLW1 22.60000038 W  
F2 - Processing parameters  
SI 65536  
SF 600.1500107 MHz  
WDW EM  
SSB 0  
LB 0.30 Hz  
GB 0  
PC 1.00

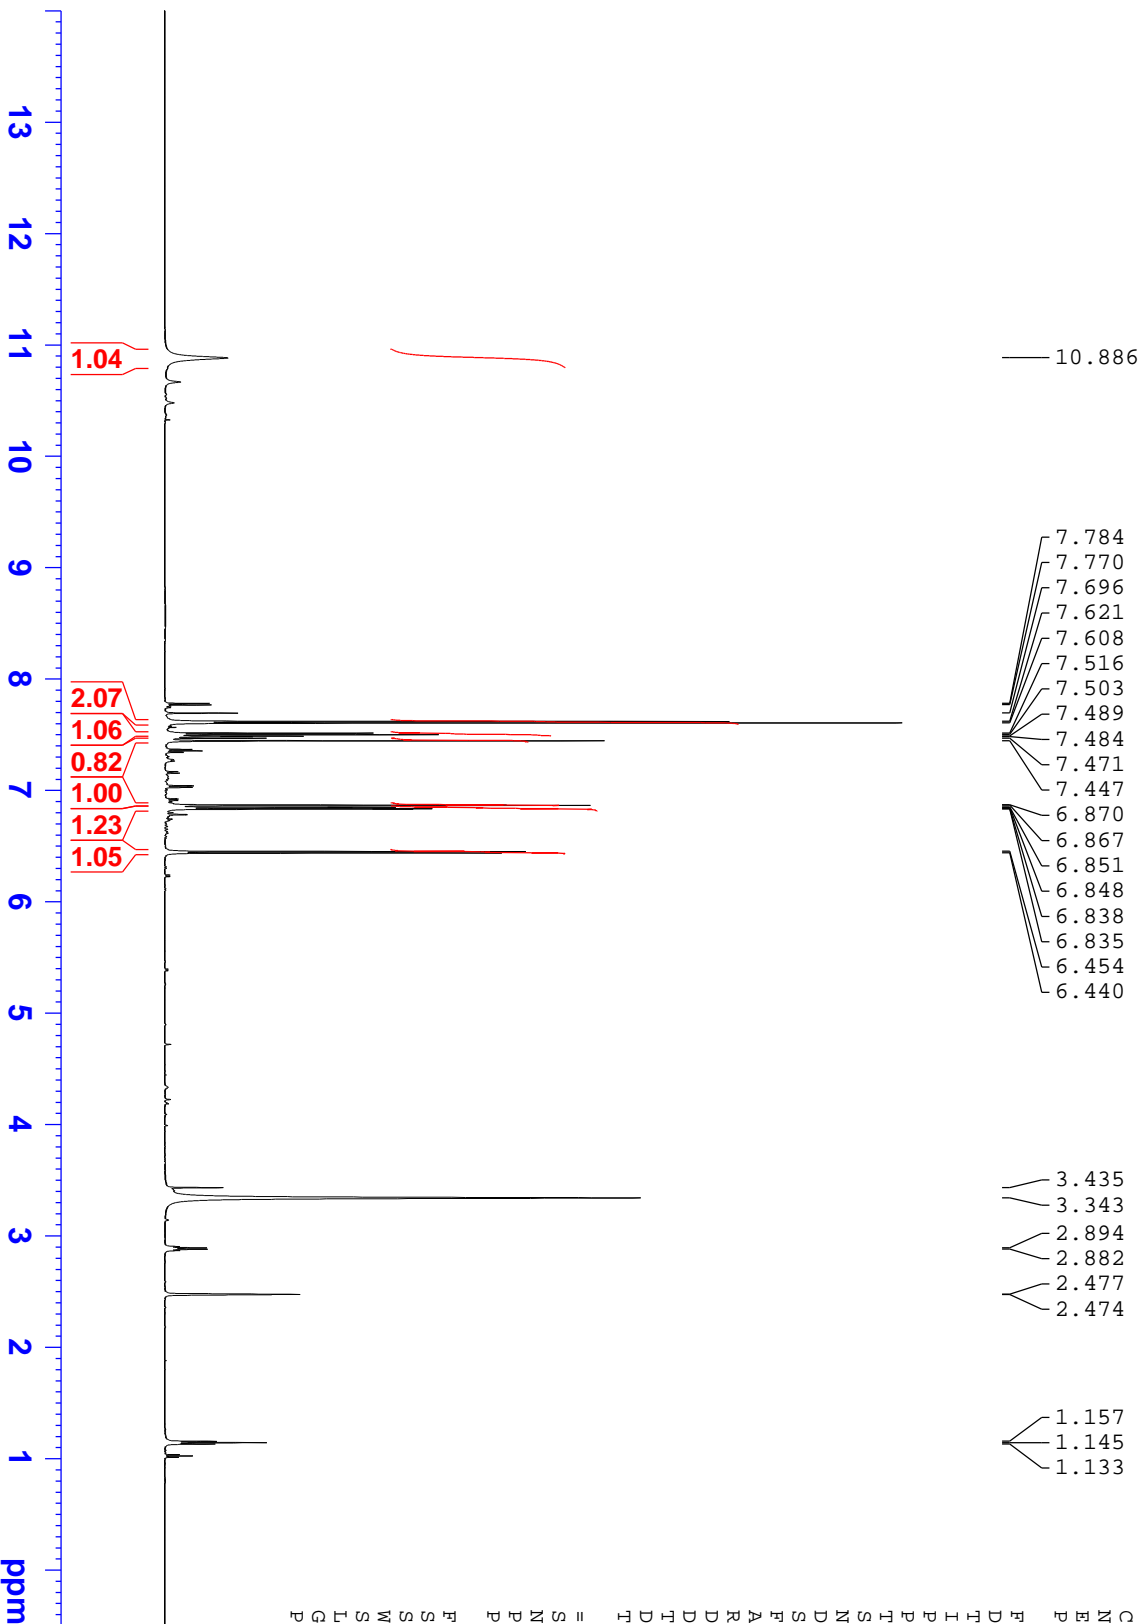

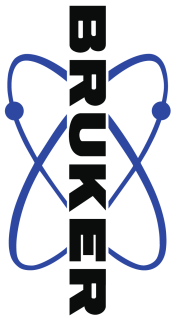

Current Data Parameters  
NAME 25-Dec-2022\_Dr. Ajmal  
EXPNO 93  
PROCNO 1

F2 - Acquisition Parameters  
Date\_ 20221229  
Time 1.14  
INSTRUM spect  
PROBHD 5 mm PABBO BB/  
PULPROG zg30  
TD 65536  
SOLVENT DMSO  
NS 16  
DS 2  
SMH 12019.230 Hz  
FIDRES 0.183399 Hz  
AQ 2.7262976 sec  
RG 56.38  
DW 41.600 usec  
DE 6.50 usec  
TE 298.2 K  
D1 1.00000000 sec  
TD0 1

===== CHANNEL f1 =====  
SFO1 600.1537062 MHz  
NUC1 1H  
P1 10.90 usec  
PLW1 22.60000038 W  
F2 - Processing parameters  
SI 65536  
SF 600.1500107 MHz  
WDW EM  
SSB 0  
LB 0.30 Hz  
GB 0  
PC 1.00

7.784  
7.770  
7.696  
7.621  
7.608  
7.516  
7.503  
7.489  
7.484  
7.471  
7.447  
6.870  
6.867  
6.851  
6.848  
6.838  
6.835  
6.454  
6.440

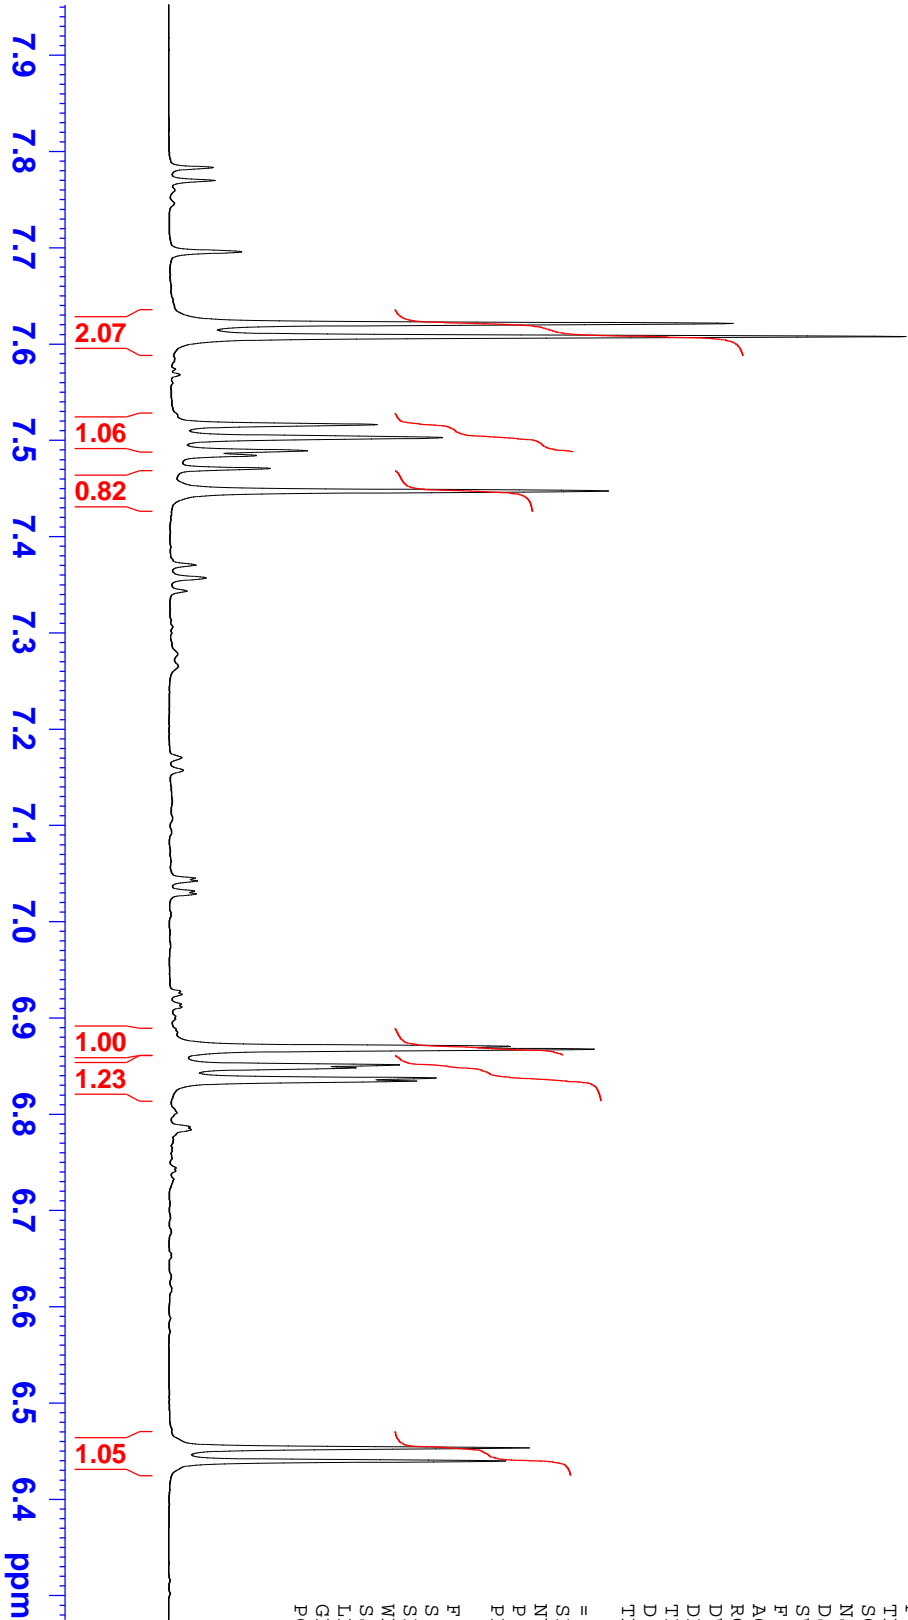

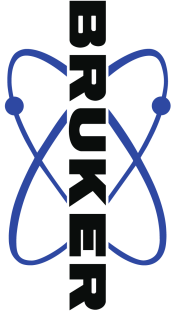

Current Data Parameters  
NAME 25-Dec-2022\_Dr. Ajmal  
EXPNO 94  
PROCNO 1

F2 - Acquisition Parameters  
Date\_ 20221229  
Time 2.40  
INSTRUM spect  
PROBHD 5 mm PABBO BB/  
PULPROG zgpg30  
TD 32768  
SOLVENT DMSO  
NS 2048  
DS 4  
SWH 36057.691 Hz  
FIDRES 1.100393 Hz  
AQ 0.4543829 sec  
RG 195.2  
DW 13.867 usec  
DE 6.50 usec  
TE 298.1 K  
D1 2.00000000 sec  
D11 0.03000000 sec  
TD0 1

===== CHANNEL f1 =====  
SFO1 150.9229276 MHz  
NUC1 13C  
P1 11.60 usec  
PLW1 83.00000000 W

===== CHANNEL f2 =====  
SFO2 600.1524006 MHz  
NUC2 1H  
CPDPRG12 waltz16  
PCPD2 70.00 usec  
PLW2 22.60000038 W  
PLW12 0.52806002 W  
PLW13 0.25874999 W

F2 - Processing parameters  
SI 32768  
SF 150.9079041 MHz  
WDW EM  
SSB 0  
LB 1.00 Hz  
GB 0  
PC 1.40

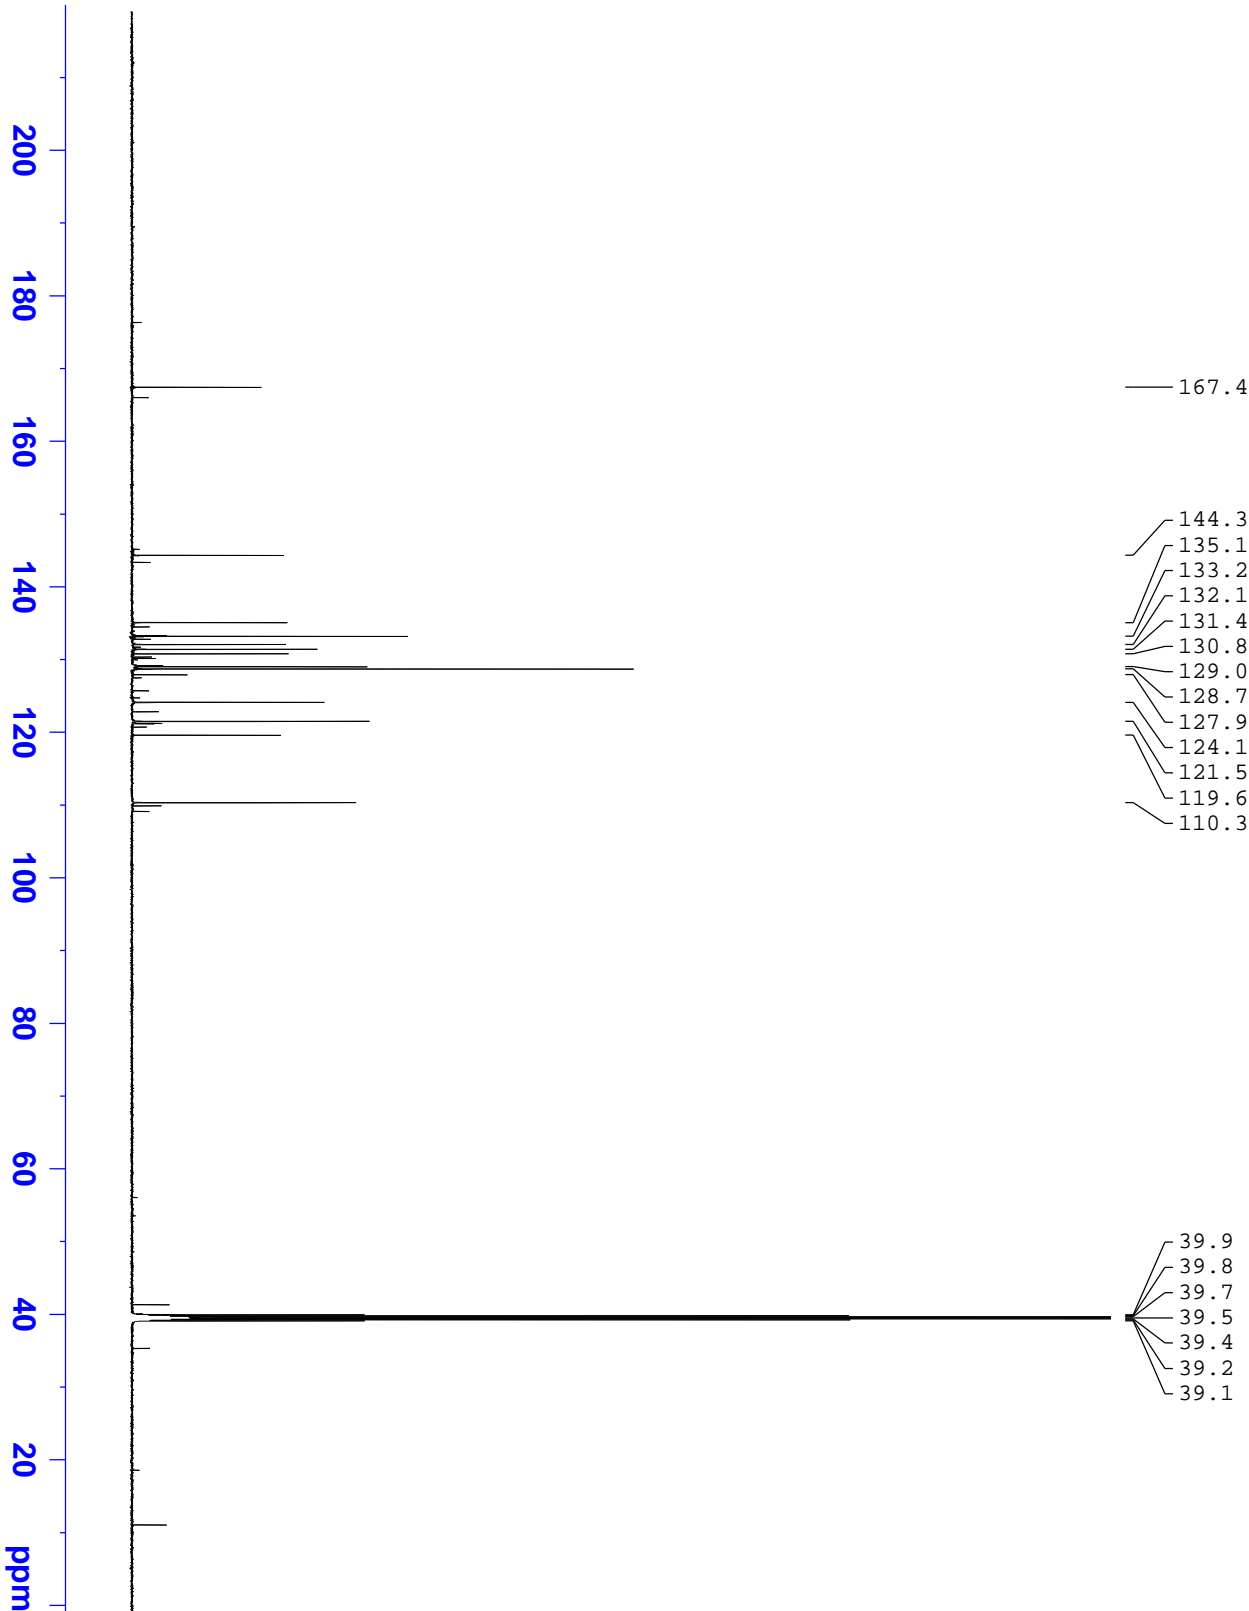

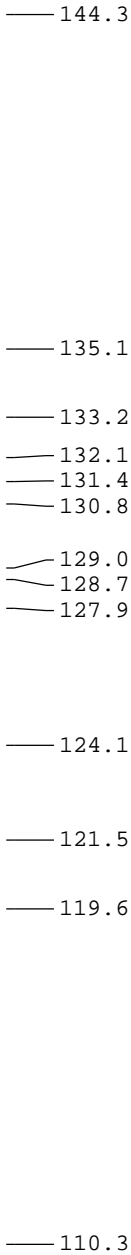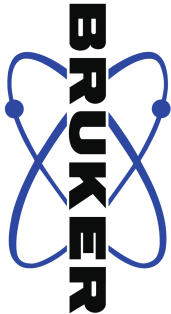

Current Data Parameters  
NAME 25-Dec-2022\_Dr. Ajmal  
EXPNO 94  
PROCNO 1

F2 - Acquisition Parameters  
Date\_ 20221229  
Time 2.40  
INSTRUM spect  
PROBHD 5 mm PABBO BB/  
PULPROG zgpg30  
TD 32768  
SOLVENT DMSO  
NS 2048  
DS 4  
SWH 36057.691 Hz  
FIDRES 1.100393 Hz  
AQ 0.4543829 sec  
RG 195.2  
DW 13.867 usec  
DE 6.50 usec  
TE 298.1 K  
D1 2.0000000 sec  
D11 0.0300000 sec  
TD0 1

===== CHANNEL f1 =====  
SFO1 150.9229276 MHz  
NUC1 13C  
P1 11.60 usec  
PLW1 83.00000000 W

===== CHANNEL f2 =====  
SFO2 600.1524006 MHz  
NUC2 1H  
CPDPRG12 waltz16  
PCPD2 70.00 usec  
PLW2 22.60000038 W  
PLW12 0.52806002 W  
PLW13 0.25874999 W

F2 - Processing parameters  
SI 32768  
SF 150.9079041 MHz  
WDW EM  
SSB 0  
LB 1.00 Hz  
GB 0  
PC 1.40

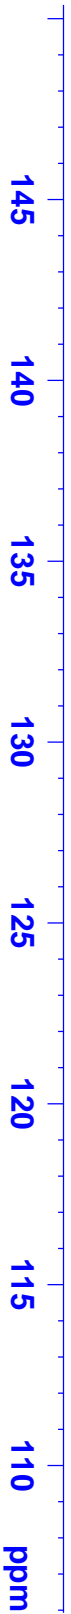

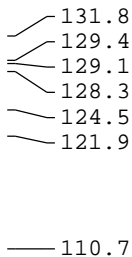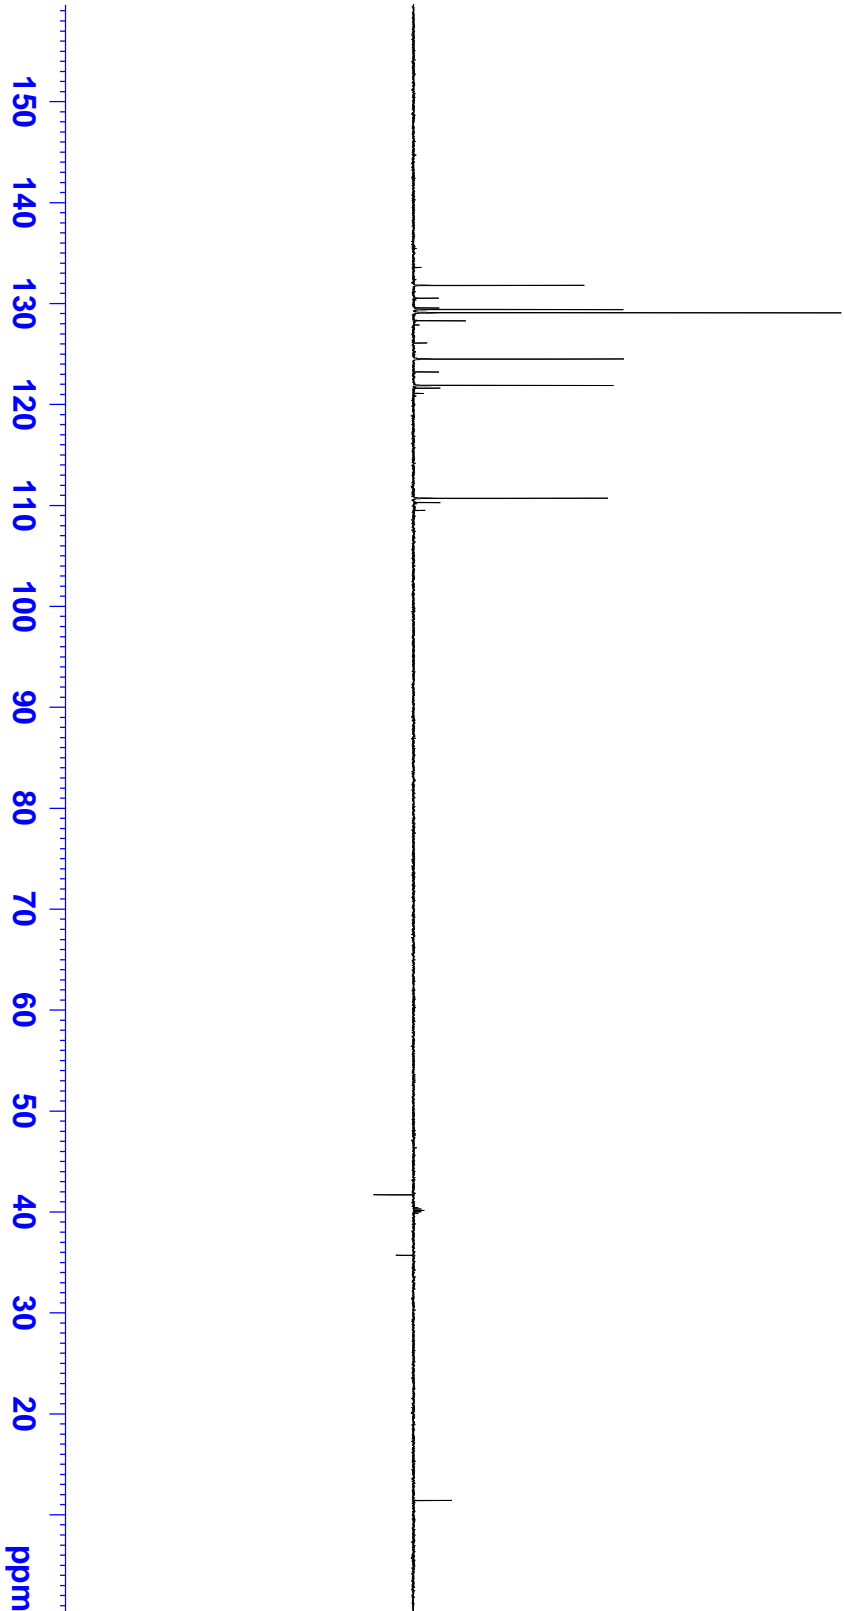

Current Data Parameters  
NAME 25-Dec-2022\_Dr. Ajmal  
EXPNO 95  
PROCNO 1

F2 - Acquisition Parameters  
Date\_ 20221229  
Time 2.52  
INSTRUM spect  
PROBHD 5 mm PABBO BB/  
PULPROG deptsp135  
TD 32768  
SOLVENT DMSO  
NS 256  
DS 4  
SWH 24038.461 Hz  
FIDRES 0.733596 Hz  
AQ 0.6815744 sec  
RG 195.2  
DW 20.800 usec  
DE 6.50 usec  
TE 298.1 K  
CNST2 145.0000000  
D1 2.00000000 sec  
D2 0.00344828 sec  
D12 0.00002000 sec  
TD0 1

==== CHANNEL f1 =====  
SFO1 150.919094 MHz  
NUC1 13C  
P1 11.60 usec  
P13 2000.00 usec  
PLW0 0 W  
PLW1 83.00000000 W  
SPNAM[5] Crp60comp.4  
SFOALS 0.500  
SPOFFS5 0 Hz  
SPW5 17.06399918 W

==== CHANNEL f2 =====  
SFO2 600.1519194 MHz  
NUC2 1H  
CPDPRG2 waltz16  
P3 10.70 usec  
P4 21.40 usec  
PCPD2 70.00 usec  
PLW2 22.60000038 W  
PLW12 0.52806002 W

F2 - Processing parameters  
SI 32768  
SF 150.9078441 MHz  
WDW EM  
SSB 0  
LB 1.00 Hz  
^

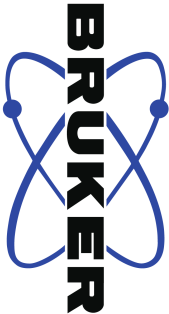

Current Data Parameters  
NAME 25-Dec-2022\_Dr. Ajmal  
EXPNO 96  
PROCNO 1

F2 - Acquisition Parameters  
Date\_ 20221229  
Time 2.58  
INSTRUM spect  
PROBHD 5 mm PABBO BB/  
PULPROG deptsp90  
TD 32768  
SOLVENT DMSO  
NS 128  
DS 4  
SWH 36231.883 Hz  
FIDRES 1.105709 Hz  
AQ 0.4521984 sec  
RG 195.2  
DW 13.800 usec  
DE 6.50 usec  
TE 298.2 K  
CNST2 145.0000000  
D1 2.00000000 sec  
D2 0.00344828 sec  
D12 0.00002000 sec  
TD0 1

==== CHANNEL f1 =====  
SFO1 150.9229283 MHz  
NUC1 13C  
P1 11.60 usec  
P13 2000.00 usec  
PLW0 0 W  
PLM1 83.00000000 W  
SPNAM[5] Crp6comp.4  
SFOALS 0.500  
SPOFFS5 0 Hz  
SPW5 17.06399918 W

==== CHANNEL f2 =====  
SFO2 600.1524006 MHz  
NUC2 1H  
CPDPRG2 waltz16  
P3 10.70 usec  
P4 21.40 usec  
PCPD2 70.00 usec  
PLW2 22.60000038 W  
PLM2 0.52806002 W

F2 - Processing parameters  
SI 32768  
SF 150.9079041 MHz  
WDW EM  
SSB 0  
LB 1.00 Hz

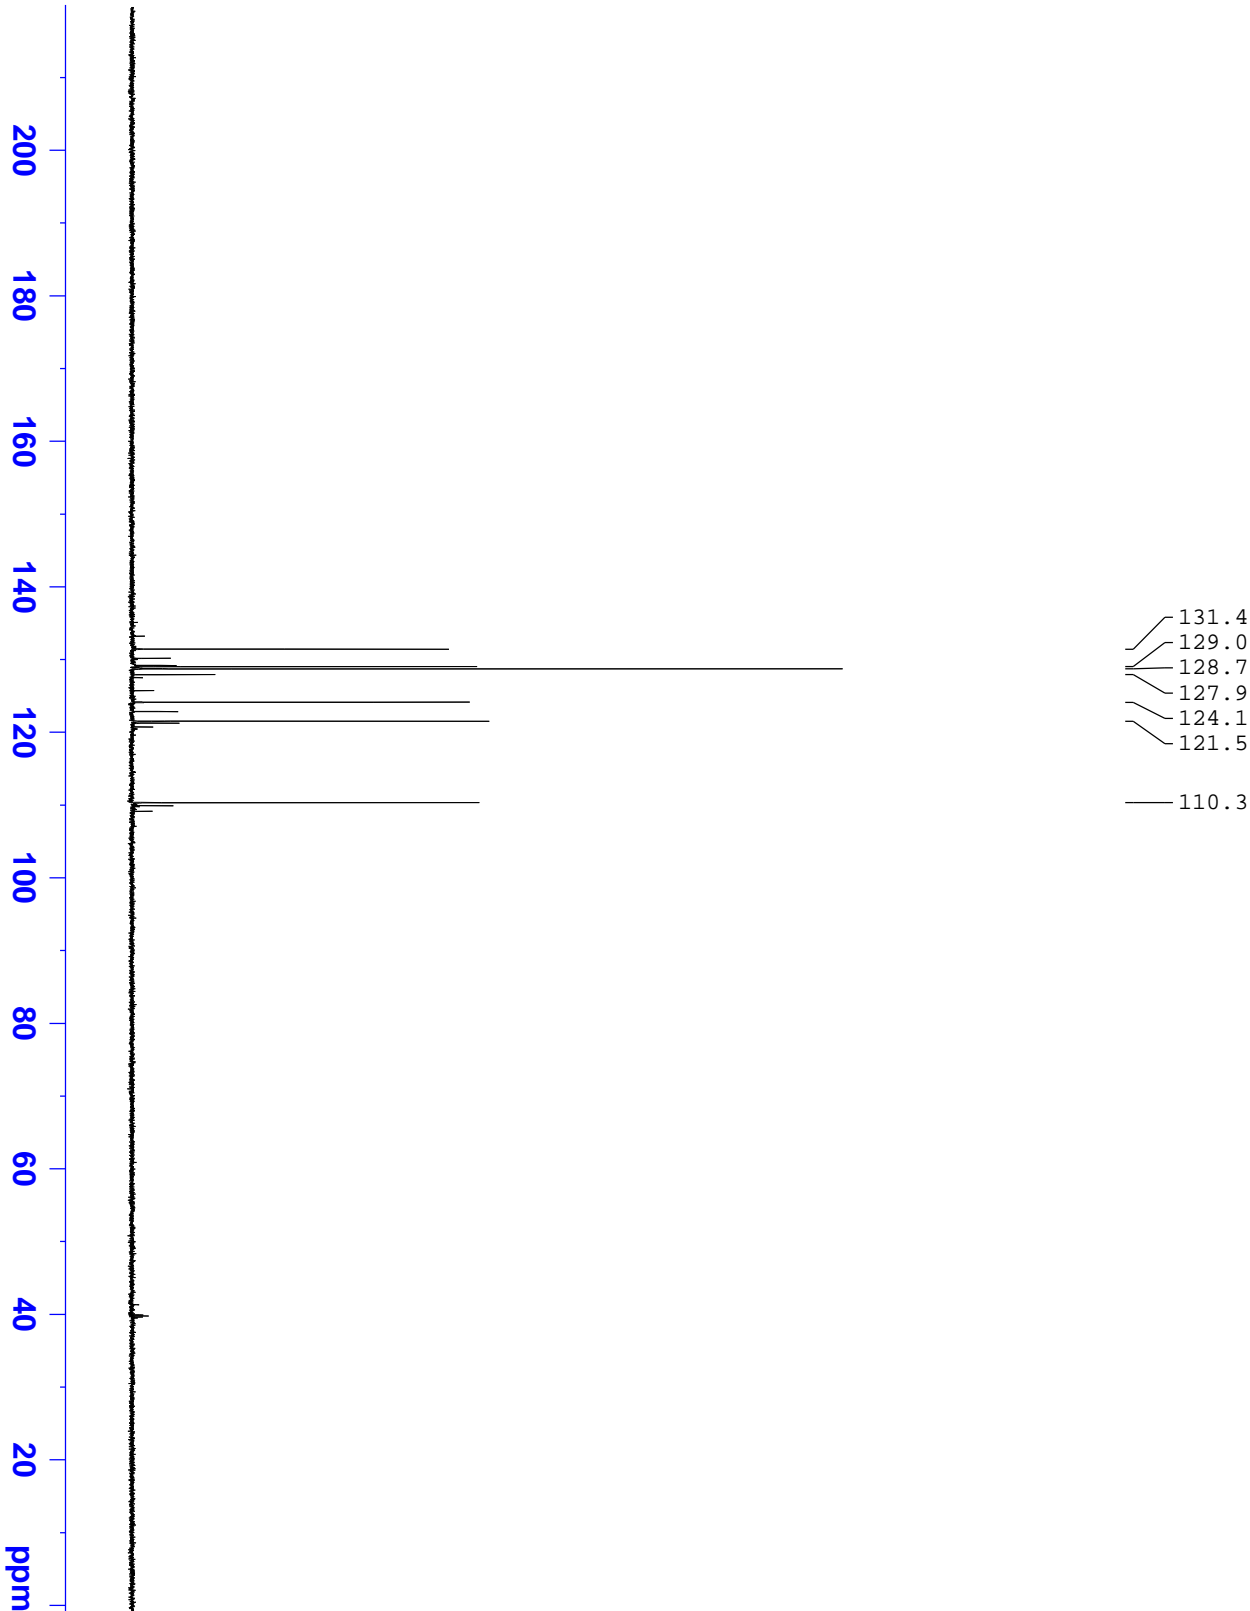

Supplement: f1 [file 5553913.f1.zip › Figure S1.pdf]
