# Supplementary material for: In Silico, SwissADME, and DFT Studies of Newly Synthesized Oxindole Derivatives Followed by Antioxidant Studies
Source: Hindawi journal article supplement (doi:10.1155/2023/5553913), 2023-12-12
Supplement: f1 [file 5553913.f1.zip]

Archive with 2 entries (2 files):
- Figure S1.pdf
- Figure S2.pdf
