# Supplementary material for: In Silico, SwissADME, and DFT Studies of Newly Synthesized Oxindole Derivatives Followed by Antioxidant Studies
Source: Hindawi journal article supplement (doi:10.1155/2023/5553913), 2023-12-12

|             |                                   |                        |         |                 |                      |
|-------------|-----------------------------------|------------------------|---------|-----------------|----------------------|
| Sample Name | FS-24                             | Position               | Vial 23 | Instrument Name | Instrument 1         |
| User Name   |                                   | Inj Vol                | 2       | InjPosition     |                      |
| Sample Type | Sample                            | IRM Calibration Status | Success | Data Filename   | FS-24.d              |
| ACQ Method  | POSITIVE ION METHOD MS_FOR_DMSO.m | Comment                |         | Acquired Time   | 19-Jan-23 3:44:22 PM |

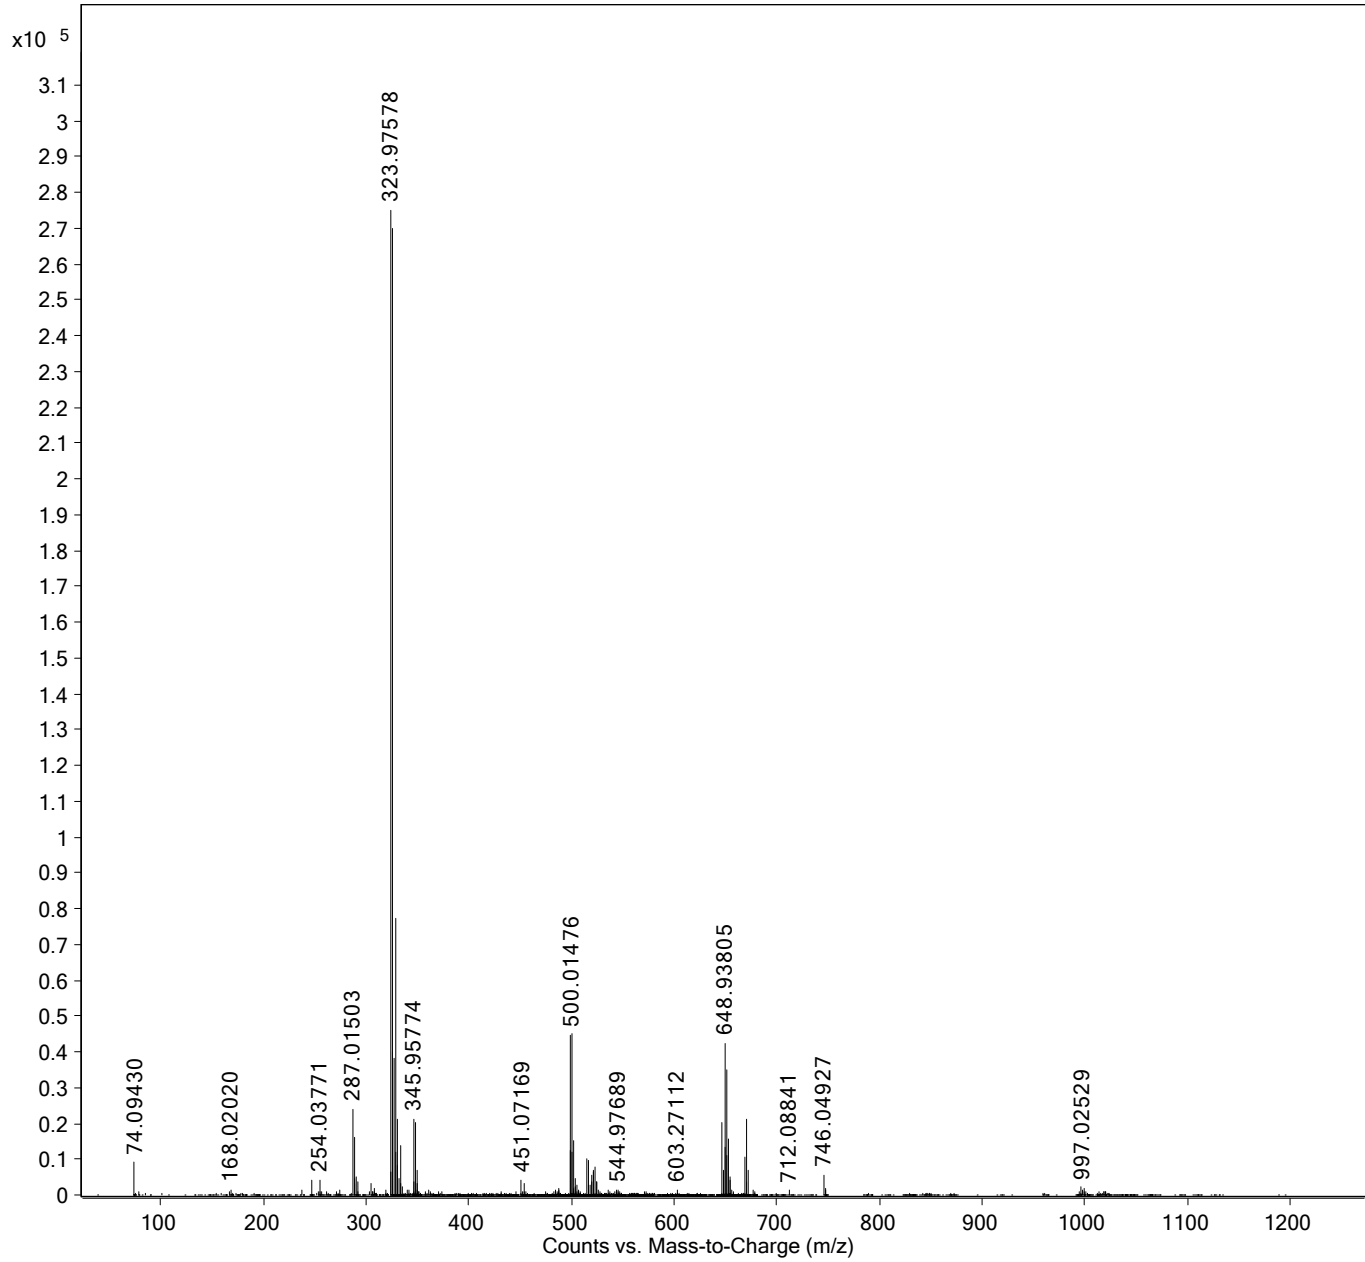

Supplement: f1 [file 5553913.f1.zip › Figure S2.pdf]
